# Supplementary material for: Underground Hydrogen Storage Safety: Experimental Study of Hydrogen Diffusion through Caprocks
Source: MDPI journal article supplement (doi:10.3390/en17020394), 2024-01-12
Supplement: s1 [file s1]

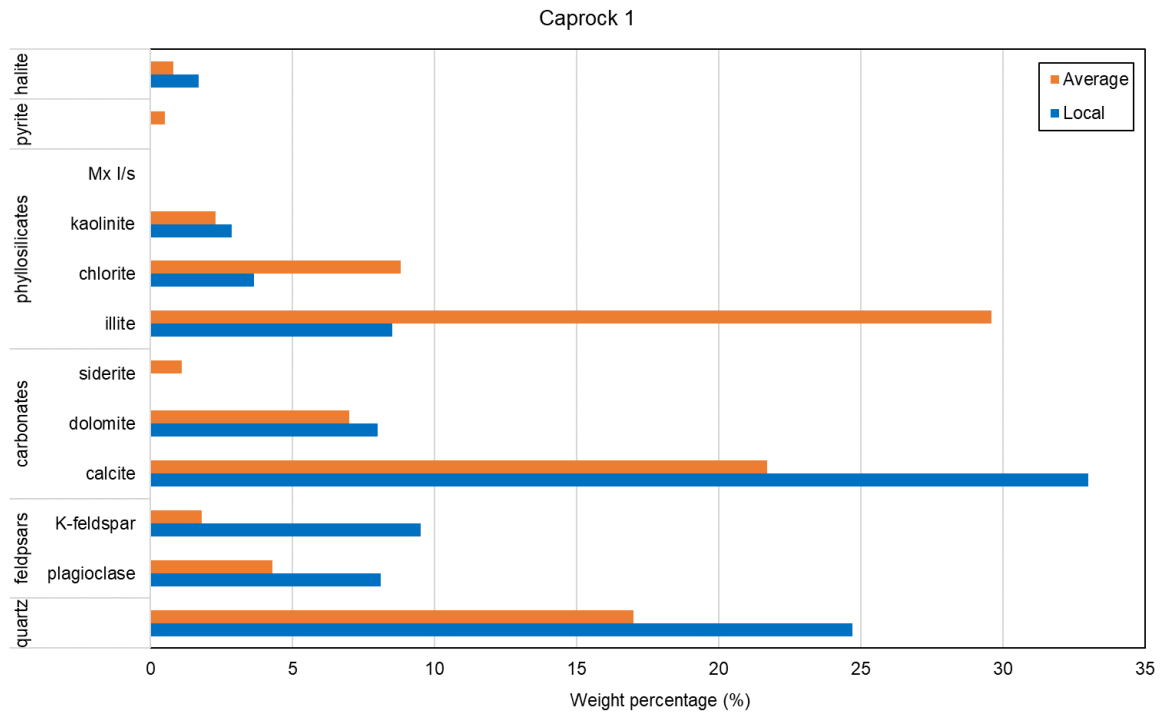

(a)

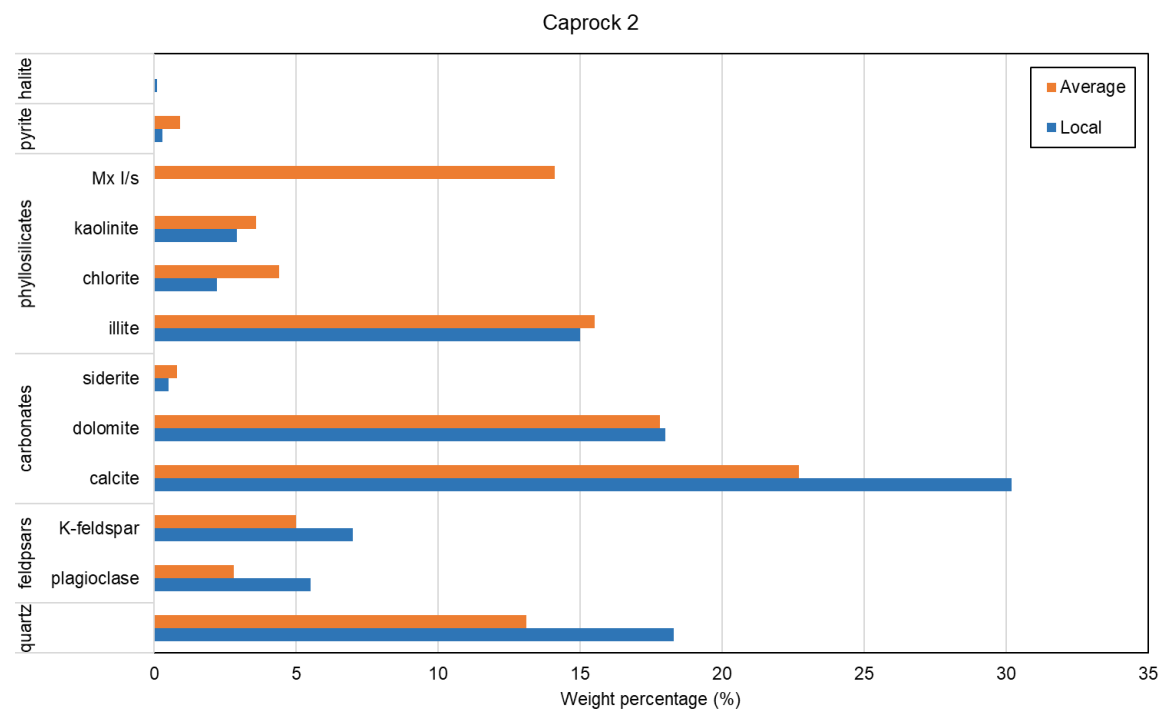

(b)

**Figure S1:** Semi-quantitative evaluation of the main classes of minerals for Caprock1 (a) and Caprock2 (b) from X-Ray Diffraction (XRD).

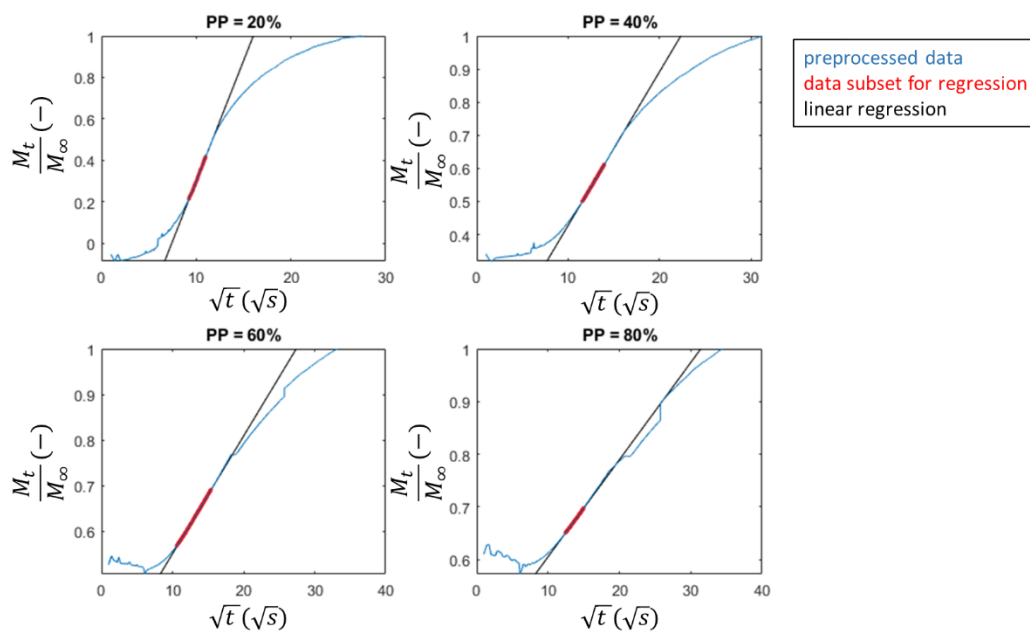

Figure S2: Interpretation of test F6\_H2\_100\_a.

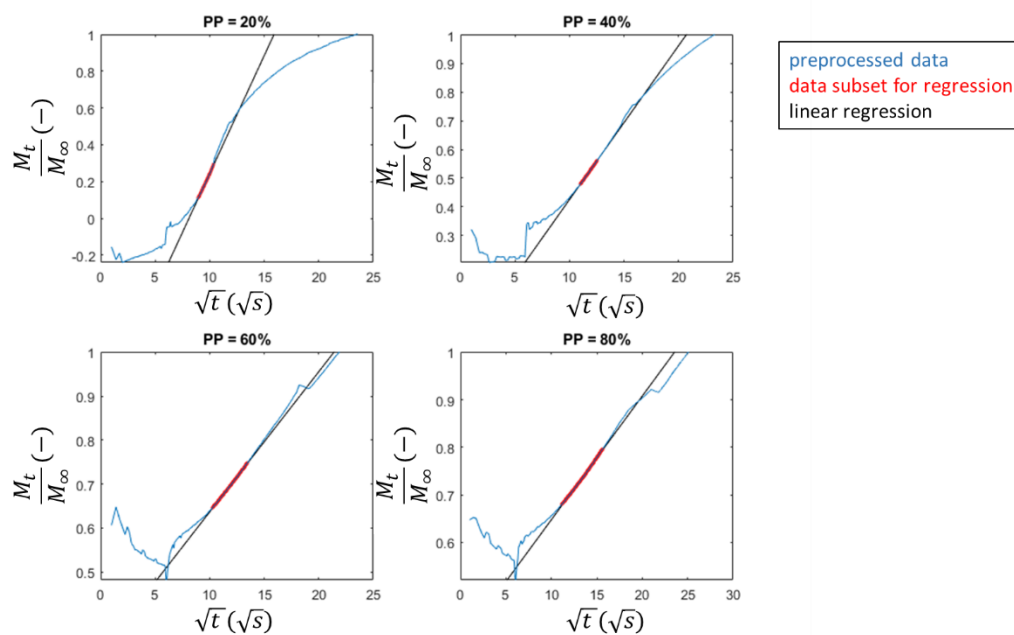

Figure S3: Interpretation of test FR2\_H2\_100\_a.
